# Supplementary material
Source: publisher figshare collection journal article supplement (https://karger.figshare.com/ndownloader/files/30609096)
Supplement: Supplementary file 1 [file 30609096]

| Table S2. Impact of the C-reactive protein value to identify pre-renal AKI episodes that have been misclassified based on uNGAL and pNGAL levels | | | | |
| --- | --- | --- | --- | --- |
|  | **n** | **Median CRP value,** mg/L |  | **n** |
| High pNGAL +  Pre-renal AKI | 7 | 179 (27-210) | CRP<20 | 1 |
| CRP>20 | 6 |
| High uNGAL +  Pre-renal AKI | 8 | 173 (6-205) | CRP<20 | 3 |
| CRP>20 | 5 |
| *High pNGAL and uNGAL levels were defined as >150 ng/mL (local cut-off)* | | | | |
